# Supplementary material
Source: Hindawi journal article supplement (doi:10.1155/2010/650794)

# Supplementary Materials

**Table S1. Classification of inhibitors of  $\alpha$ -synuclein fibrillation**

- Non-inhibitors.
- + Weak inhibitors, with a lag time 2 or 3 times longer than control;
- ++ Good inhibitory effect; with a lag time 4 or 5 times longer than control;
- +++ Excellent inhibitors, completely inhibit synuclein fibril formation after 3 days incubation;

## Flavonols:

| Catalog NO. / Name<br>Synonym                             | Activity | 8  | 7  | 6  | 5  | 3   | 2' | 3' | 4' | 5' | 6' |
|-----------------------------------------------------------|----------|----|----|----|----|-----|----|----|----|----|----|
| Quercetin<br>3,5,7,3',4'-Pentahydroxyflavone<br>dihydrate | ++       | H  | OH | H  | OH | OH  | H  | OH | OH | H  | H  |
| Fisetin<br>3,7,3',4'-Tetrahydroxyflavone                  | +        | H  | OH | H  | H  | OH  | H  | OH | OH | H  | H  |
| T-601<br>3',4'-Dihydroxyflavonol                          | +        | H  | H  | H  | H  | OH  | H  | OH | OH | H  | H  |
| 22-344<br>3,6,3',4'-Tetrahydroxyflavone                   | +        | H  | H  | OH | H  | OH  | H  | OH | OH | H  | H  |
| 22-318<br>3,6,2',3'- Tetrahydroxyflavone                  | +        | H  | H  | OH | H  | OH  | OH | OH | H  | H  | H  |
| G-500 / Gossypetin<br>3,5,7,8,3',4'-Hexahydroxyflavone    | ++       | OH | OH | H  | OH | OH  | H  | OH | OH | H  | H  |
| C-101 / Myricetin<br>3,5,7,3',4',5'-Hexahydroxyflavone,   | +++      | H  | OH | H  | OH | OH  | H  | OH | OH | OH | H  |
| Rutin<br>Quercetin-3-rutinoside                           | +        | H  | OH | H  | OH | Rut | H  | OH | OH | OH | H  |

| Catalog NO. / Name/ Synonym                                          | Activity | 8 | 7  | 6 | 5  | 3  | 2' | 3' | 4'  | 5'  | 6' |
|----------------------------------------------------------------------|----------|---|----|---|----|----|----|----|-----|-----|----|
| K-102 / Kaempferol<br>3,5,7,4'-Tetrahydroxyflavone                   | -        | H | OH | H | OH | OH | H  | H  | OH  | H   | H  |
| 020065 / Isorhamnetin<br>3'-Methoxy-3,5,7,4'-<br>Tetrahydroxyflavone | -        | H | OH | H | OH | OH | H  | H  | OH  | OMe | H  |
| 020067 / Galangin<br>3,5,7-Trihydroxyflavone                         | -        | H | OH | H | OH | OH | H  | H  | H   | H   | H  |
| 021140S / Tamarixetin<br>4'-Methoxy-3,5,7,3'-<br>Tetrahydroflavone   | -        | H | OH | H | OH | OH | H  | OH | OMe | H   | H  |

## Flavones:

| Catalog NO. / Name<br>Synonym                         | Activity | 8 | 7   | 6  | 5  | 3 | 2' | 3' | 4' | 5' | 6' |
|-------------------------------------------------------|----------|---|-----|----|----|---|----|----|----|----|----|
| 22-324<br>6,2',3'- Trihydroxyflavone                  | +++      | H | H   | H  | H  | H | OH | OH | H  | H  | OH |
| D-406<br>2',3'- Dihydroxyflavone                      | ++       | H | H   | H  | H  | H | OH | OH | H  | H  | H  |
| D-258<br>3',4'- Dihydroxyflavone                      | ++       | H | H   | H  | H  | H | H  | OH | OH | H  | H  |
| D-116<br>5,6-Dihydroxy-7-Methoxyflavone               | ++       | H | OMe | OH | OH | H | H  | H  | H  | H  | H  |
| 22-357<br>5,6- Dihydroxyflavone                       | +        | H | H   | OH | OH | H | H  | H  | H  | H  | H  |
| 22-336<br>6,7,3'- Trihydroxyflavone                   | +        | H | OH  | OH | H  | H | H  | OH | H  | H  | H  |
| D-112<br>6,7- Dihydroxyflavone                        | +        | H | OH  | OH | H  | H | H  | H  | H  | H  | H  |
| Luteolin<br>5,7,3',4'-Tetrahydroxyflavone             | +        | H | OH  | H  | OH | H | H  | OH | OH | H  | H  |
| 22-340 / Tricetin<br>5,7,3',4',5'-Pentahydroxyflavone | +++      | H | OH  | H  | OH | H | H  | OH | OH | OH | H  |
| 22-341<br>7,3',4',5'- Tetrahydroxyflavone             | +++      | H | OH  | H  | H  | H | H  | OH | OH | OH | H  |
| 021165 / 6-HP<br>5,6,7,4'-Tetrahydroxyflavone         | +++      | H | OH  | OH | OH | H | H  | H  | OH | H  | H  |
| B-101 / Baicalein<br>5,6,7- Trihydroxyflavone         | +++      | H | OH  | OH | OH | H | H  | H  | H  | H  | H  |

| Catalog NO. / Name<br>Synonym                                       | Activity | 8   | 7   | 6   | 5   | 3 | 2'  | 3'  | 4'  | 5'  | 6'  |
|---------------------------------------------------------------------|----------|-----|-----|-----|-----|---|-----|-----|-----|-----|-----|
| 22-323<br>6,2',3'-<br>Trimethoxyflavone                             | -        | H   | H   | H   | H   | H | OMe | OMe | H   | H   | OMe |
| D-407<br>2',4'-<br>Dihydroxyflavone                                 | -        | H   | H   | H   | H   | H | OH  | H   | OH  | H   | H   |
| 021104S /<br>Chrysoeriol<br>4',5,7-Trihydroxy-3'-<br>Methoxyflavone | -        | H   | OH  | H   | OH  | H | H   | H   | OH  | OMe | H   |
| 021108S / Diosmetin<br>5,7,3'-Trihydroxy-4'-<br>Methoxyflavone      | -        | H   | OH  | H   | OH  | H | H   | OH  | OMe | H   | H   |
| Wogonin<br>5,7-Dihydroxy-8-<br>Methoxyflavone                       | -        | OMe | OH  | H   | OH  | H | H   | H   | H   | H   | H   |
| H-114<br>3'-Hydroxy-5,6,7,4'-<br>Tetramethoxyflavone                | -        | H   | OMe | OMe | OMe | H | H   | OH  | OMe | H   | H   |

## Flavanones:

| Catalog NO. / Name<br>Synonym                                                                      | Activity | 8 | 7  | 6 | 5  | 3 | 2' | 3' | 4' | 5' | 6' |
|----------------------------------------------------------------------------------------------------|----------|---|----|---|----|---|----|----|----|----|----|
| 020056 / Eriodictyol<br>2-[3,4-Dihydroxyphenyl] 2,3-dihydro-5,7-<br>dihydroxy-4H-1benzopyran-4-one | +++      | H | OH | H | OH | H | H  | OH | OH | H  | H  |

| Catalog NO. / Name<br>Synonym                                         | Activity | 8 | 7   | 6 | 5  | 3 | 2' | 3' | 4'  | 5'  | 6' |
|-----------------------------------------------------------------------|----------|---|-----|---|----|---|----|----|-----|-----|----|
| H-103 / Hesperetin<br>5,7,3'-Trihydroxy-4'-<br>methoxyflavanone       | -        | H | OH  | H | OH | H | H  | OH | OMe | H   | H  |
| 020091 / Homoeriodictyol<br>5,7,4'-Trihydroxy-5'-<br>methoxyflavanone | -        | H | OH  | H | OH | H | H  | H  | OH  | OMe | H  |
| Hesperidin/<br>Hesperetin-7-O-rutinoside                              | -        | H | Rut | H | OH | H | H  | OH | OMe | H   | H  |

## Flavanols:

| Catalog NO. / Name<br>Synonym                    | Activity | 8 | 7  | 6 | 5 | 3  | 2' | 3' | 4' | 5' | 6' |
|--------------------------------------------------|----------|---|----|---|---|----|----|----|----|----|----|
| D-105 / Fustin<br>3,7,3',4'- Tetrahydroxyflavone | +        | H | OH | H | H | OH | H  | OH | OH | H  | H  |
| 021037<br>3,3',4',5',7-Pentahydroxyflavanone     | +        | H | OH | H | H | OH | H  | OH | OH | OH | H  |

Non-inhibitors were not tested.

## Isoflavonoids:

| Catalog NO. / Name<br>Synonym          | Activity | 8 | 7  | 6  | 5 | 2 | 2' | 3' | 4' | 5' | 6' |
|----------------------------------------|----------|---|----|----|---|---|----|----|----|----|----|
| T-116<br>6,7,4'- Trihydroxyisoflavone  | +        | H | OH | OH | H | H | H  | H  | OH | H  | H  |
| T-415<br>7,3',4'- Trihydroxyisoflavone | +++      | H | OH | H  | H | H | H  | OH | OH | H  | H  |

| Catalog NO. / Name<br>Synonym                          | Activity | 8 | 7  | 6 | 5  | 2 | 2' | 3' | 4'  | 5'  | 6' |
|--------------------------------------------------------|----------|---|----|---|----|---|----|----|-----|-----|----|
| 19-612<br>3',4'-Dimethoxy-7-hydroxyisoflavone          | -        | H | OH | H | H  | H | H  | H  | OMe | OMe | H  |
| D-101 / Daidzein<br>7,4'-Dihydroxyisoflavone           | -        | H | OH | H | H  | H | H  | H  | H   | OH  | H  |
| F-103 / Formononetin<br>7-Hydroxy-4'-methoxyisoflavone | -        | H | OH | H | H  | H | H  | H  | H   | OMe | H  |
| Biochanin A<br>5,7-Dihydroxy-4'-methoxyisoflavone      | -        | H | OH | H | OH | H | H  | H  | H   | OMe | H  |

## Catechins:

| Catalog NO. / Name<br>Synonym                                                                                                                              | Activity | 8 | 7  | 6 | 5  | 4 | 3       | 2' | 3' | 4' | 5' | 6' |
|------------------------------------------------------------------------------------------------------------------------------------------------------------|----------|---|----|---|----|---|---------|----|----|----|----|----|
| 020976S / Catechin<br>(+)-3,3',4',5,7-Flavanepentol<br>(2H)-benzopyran-3,5,7-triol /<br>(2R,3R)-2-(3,4-Dihydroxyphenyl)-<br>3,4-dihydro-1                  | +        | H | OH | H | OH | H | OH      | H  | OH | OH | H  | H  |
| Epicatechin gallate (ECG)<br>((2R,3R) -2-(3,4-Dihydroxyphenyl)-<br>3,4-dihydro-1<br>(2H) -benzopyran-3,5,7-triol 3-<br>(3,4,5-trihydroxybenzoate)          | +        | H | OH | H | OH | H | gallate | H  | OH | OH | H  | H  |
| EpigalloCatechin Gallate<br>(EGCG)<br>(2R,3R)-2-(3,4,5-<br>Trihydroxyphenyl)-3,4-dihydro-<br>1(2H)-benzopyran-3,5,7-triol 3-<br>(3,4,5-trihydroxybenzoate) | +++      | H | OH | H | OH | H | gallate | OH | OH | OH | H  | H  |

Non-inhibitors were not tested.

## Anthraquinones:

| Catalog NO. / Name<br>Synonym                   | Activity | 8 | 7 | 6 | 5 | 3 | 2' | 3' | 4' | 5' | 6' |
|-------------------------------------------------|----------|---|---|---|---|---|----|----|----|----|----|
| 020411 / Alizarin<br>1,2-Dihydroxyanthraquinone | +        |   |   |   |   |   |    |    |    |    |    |

| Catalog NO. / Name<br>Synonym                       | Activity | 8 | 7 | 6 | 5 | 3 | 2' | 3' | 4' | 5' | 6' |
|-----------------------------------------------------|----------|---|---|---|---|---|----|----|----|----|----|
| Chrysophanol<br>1,8-Dihydroxy-3-methylanthraquinone | -        |   |   |   |   |   |    |    |    |    |    |
| Emodin<br>1,3,8-Trihydroxy-6-methylanthraquinone    | -        |   |   |   |   |   |    |    |    |    |    |

**Figure S1.** Instant changes in the intensity of ThT fluorescence upon adding 50  $\mu$ M flavonoids directly to the existing  $\alpha$ -synuclein fibril solution

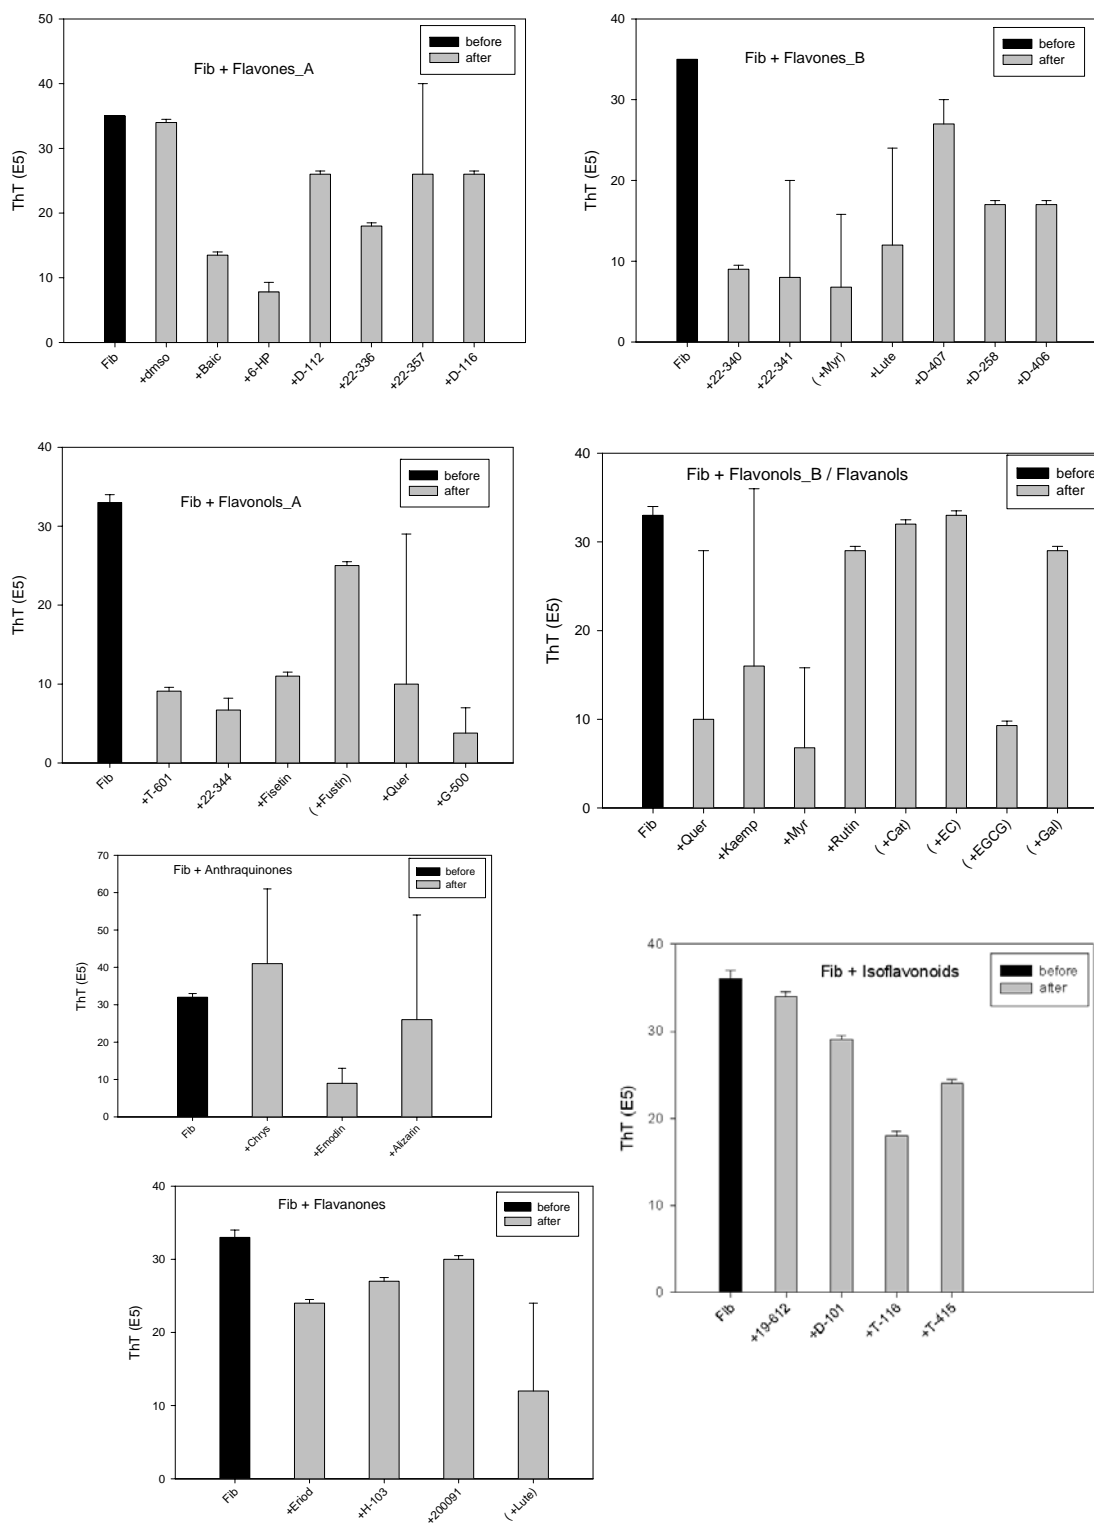

Supplement: f1 [file 650794.f1.pdf]
